# Supplementary material
Source: Research Square preprint supplement (doi:10.21203/rs.3.rs-8924942/v1)
Supplement: Supplementary file 1 [file 0b29e9488305b21f2b6f93e2.docx]

• Identified 144 active compounds and 86 therapeutic targets of Banxia Xiexin Decoction for acute gastroenteritis.

• STAT3 and TNF emerged as key anti-inflammatory targets through network pharmacology.

• Molecular docking revealed strong binding affinities of isorhamnetin and 7-methoxy-2-methyl-isoflavone.

• Molecular dynamics simulations confirmed stable ligand–target interactions and favorable energetics.

• Provides mechanistic insights and computational evidence supporting the traditional use of Banxia Xiexin Decoction.
