# Supplementary material
Source: Research Square preprint supplement (doi:10.21203/rs.3.rs-8924942/v1)
Supplement: Supplementary file 2 [file 521b14cd789e0d234689673b.docx]

**Checklist**

| **Item** | **Yes/No** | **Notes** |
| --- | --- | --- |
| The manuscript is original and has not been submitted elsewhere. | Yes |  |
| All authors have read and approved the final manuscript. | Yes |  |
| A Cover Letter has been included in the submission. | Yes |  |
| Highlights have been prepared according to journal guidelines. | Yes |  |
| The manuscript follows the EJIM formatting guidelines. | Yes |  |
| All figures are high-resolution and embedded in the manuscript. | Yes |  |
| Conflict of Interest statement is provided. | Yes |  |
| Funding statement is included (if applicable). | Yes |  |
| Author contributions statement is provided. | Yes |  |
| Ethical approval is included if required (not needed for in silico study). | Yes |  |
| References follow the journal style. | Yes |  |
